# Supplementary material for: Landscape of Congenital Adrenal Hyperplasia Newborn Screening in the United States
Source: MDPI journal article supplement (doi:10.3390/ijns6030064), 2020-08-14
Supplement: s1 [file s1]

## Article

### Landscape of Congenital Adrenal Hyperplasia newborn screening in the United States

Sari Edelman <sup>1\*</sup>, Hiral Desai <sup>1</sup>, Trey Pigg <sup>1</sup>, Careema Yusuf <sup>1</sup> and Jelili Ojodu <sup>1</sup>

<sup>1</sup> Association of Public Health Laboratories, Silver Spring, MD 20910, USA

## Supplementary Materials

NewSTEPs Public Health Surveillance Case Definitions:

### 21-Hydroxylase Deficiency – Classic Salt Wasting

| Category | Serum 17- OHP<br>-<br>baseline or<br>ACTH<br>stimulated* | Urinary steroid<br>profiling | Serum<br>Sodium<br>mE q/L | Plasma<br>Renin<br>Activity | CYP21A2 Mutation<br>Analysis | If available<br>-<br>Supportive<br>Clinical or<br>Laboratory<br>Evidence            |
|----------|----------------------------------------------------------|------------------------------|---------------------------|-----------------------------|------------------------------|-------------------------------------------------------------------------------------|
| Definite | > 10,000                                                 | Untested or<br>unknown       | < 135                     | Untested or<br>unknown      | Untested or unknown          | Evidence of salt<br>wasting (present<br>in shock or<br>severe failure to<br>thrive) |
| Definite | > 10,000                                                 | Untested or<br>unknown       | <135                      | Untested or<br>unknown      | Untested or unknown          | ambiguous genitalia<br>in 46, XX                                                    |
| Definite | > 10,000                                                 | Untested or<br>unknown       | <135                      | Untested or<br>unknown      | Untested or unknown          | other hormonal<br>evidence of<br>CAH                                                |
| Definite | > 10,000                                                 | Untested or<br>unknown       | Untested or<br>unknown    | Elevated for<br>age         | Untested or unknown          | Evidence of salt<br>wasting (present<br>in shock or<br>severe failure to<br>thrive) |

|          |                     |                                                                  |                     |                     |                                                         |                                                                         |
|----------|---------------------|------------------------------------------------------------------|---------------------|---------------------|---------------------------------------------------------|-------------------------------------------------------------------------|
| Definite | > 10,000            | Untested or unknown                                              | Untested or unknown | Elevated for age    | Untested or unknown                                     | ambiguous genitalia in 46, XX                                           |
| Definite | > 10,000            | Untested or unknown                                              | Untested or unknown | Elevated for age    | Untested or unknown                                     | other hormonal evidence of CAH                                          |
| Definite | Untested or unknown | Untested or unknown                                              | Untested or unknown | Untested or unknown | two classic gene mutations or deletions <i>in trans</i> | Evidence of salt wasting (present in shock or severe failure to thrive) |
| Definite | Untested or unknown | Untested or unknown                                              | Untested or unknown | Untested or unknown | two classic gene mutations or deletions <i>in trans</i> | ambiguous genitalia in 46, XX                                           |
| Definite | Untested or unknown | Untested or unknown                                              | Untested or unknown | Untested or unknown | two classic gene mutations or deletions <i>in trans</i> | other hormonal evidence of CAH                                          |
| Definite | Untested or unknown | (mass spectrometry ) indicative of 21-Hydroxylase Deficiency CAH | Untested or unknown | Untested or unknown | Untested or unknown                                     | Evidence of salt wasting (present in shock or severe failure to thrive) |
| Definite | Untested or unknown | (mass spectrometry ) indicative of 21-Hydroxylase Deficiency CAH | Untested or unknown | Untested or unknown | Untested or unknown                                     | ambiguous genitalia in 46, XX                                           |

## 21-Hydroxylase Deficiency – Classic Salt Wasting

| Category | Serum 17-OHP<br>- baseline or<br>ACTH<br>stimulated* | Urinary steroid<br>profiling                                                 | Serum<br>Sodium<br>mEq/ L | Plasma<br>Renin<br>Activity | CYP21A2<br>Mutation Analysis | If<br>available<br>-<br>Supportiv<br>e Clinical<br>or<br>Laboratory<br>Evidence     |
|----------|------------------------------------------------------|------------------------------------------------------------------------------|---------------------------|-----------------------------|------------------------------|-------------------------------------------------------------------------------------|
| Definite | Untested or<br>unknown                               | (mass<br>spectrometry)<br>indicative of 21-<br>Hydroxylase<br>Deficiency CAH | Untested or<br>unknown    | Untested or<br>unknown      | Untested or<br>unknown       | other hormonal<br>evidence of CAH                                                   |
| Probable | 1,000 -10,000                                        | Untested or<br>unknown                                                       | < 135                     | Untested or<br>unknown      | Untested or<br>unknown       | Evidence of salt<br>wasting (present<br>in shock or<br>severe failure to<br>thrive) |
| Probable | 1,000 -10,000                                        | Untested or<br>unknown                                                       | < 135                     | Untested or<br>unknown      | Untested or<br>unknown       | ambiguous genitalia<br>in 46,XX                                                     |
| Probable | 1,000 -10,000                                        | Untested or<br>unknown                                                       | < 135                     | Untested or<br>unknown      | Untested or<br>unknown       | other hormonal<br>evidence of CAH                                                   |
| Probable | 1,000 -10,000                                        | Untested or<br>unknown                                                       | Untested or<br>unknown    | Elevated for<br>age         | Untested or<br>unknown       | Evidence of salt<br>wasting (present<br>in shock or<br>severe failure to<br>thrive) |

|          |               |                     |                     |                  |                     |                                |
|----------|---------------|---------------------|---------------------|------------------|---------------------|--------------------------------|
| Possible | 1,000 -10,000 | Untested or unknown | Untested or unknown | Elevated for age | Untested or unknown | ambiguous genitalia in 46,XX   |
| Possible | 1,000 -10,000 | Untested or unknown | Untested or unknown | Elevated for age | Untested or unknown | other hormonal evidence of CAH |

## 21-Hydroxylase Deficiency-Classical Simple Virilizing

| Category | Serum 17-OHP<br>-<br>baseline or<br>ACTH<br>stimulated* | Urinary Steroid<br>profiling                                                       | Serum<br>Sodium<br>mEq/L | Plasma<br>Renin<br>Activity | CYP21 A2<br>Mutation Analysis | If available<br>-<br>Supportive<br>Clinical or<br>Laboratory<br>Evidence |
|----------|---------------------------------------------------------|------------------------------------------------------------------------------------|--------------------------|-----------------------------|-------------------------------|--------------------------------------------------------------------------|
| Definite | >10,000                                                 | Untested or<br>unknown                                                             | >135                     | Untested<br>or<br>unknown   | Untested or unknown           | Ambiguous<br>genitalia in<br>46,XX                                       |
| Definite | >10,000                                                 | Untested or<br>unknown                                                             | >135                     | Untested<br>or<br>unknown   | Untested or unknown           | no evidence of salt<br>wasting                                           |
| Definite | >10,000                                                 | Untested or<br>unknown                                                             | >135                     | Untested<br>or<br>unknown   | Untested or unknown           | other hormonal<br>evidence of CAH                                        |
| Definite | >10,000                                                 | Untested or<br>unknown                                                             | Untested or<br>unknown   | Normal<br>for age           | Untested or unknown           | Ambiguous<br>genitalia in<br>46,XX                                       |
| Definite | >10,000                                                 | Untested or<br>unknown                                                             | Untested or<br>unknown   | Normal<br>for age           | Untested or<br>unknown        | no evidence of salt<br>wasting                                           |
| Definite | >10,000                                                 | Untested or<br>unknown                                                             | Untested or<br>unknown   | Normal<br>for age           | Untested or<br>unknown        | other hormonal<br>evidence of CAH                                        |
| Definite | Untested or<br>unknown                                  | (mass<br>spectrometry)<br>indicative of<br>21-<br>Hydroxylase<br>Deficiency<br>CAH | >135                     | Untested<br>or<br>unknown   | Untested or unknown           | Ambiguous<br>genitalia in<br>46,XX                                       |



## 21-Hydroxylase Deficiency-Classical Simple Virilizing

| Category | Serum 17-OHP<br>- baseline or<br>ACTH<br>stimulated* | Urinary Steroid<br>profiling                                                 | Serum<br>Sodium<br>mEq/L | Plasma<br>Renin<br>Activity | CYP21A2<br>Mutation Analysis                                  | If available<br>-<br>Supportive<br>Clinical or<br>Laboratory<br>Evidence |
|----------|------------------------------------------------------|------------------------------------------------------------------------------|--------------------------|-----------------------------|---------------------------------------------------------------|--------------------------------------------------------------------------|
| Definite | Untested or<br>unknown                               | (mass<br>spectrometry)<br>indicative of 21-<br>Hydroxylase<br>Deficiency CAH | Untested or<br>unknown   | Normal for<br>age           | Untested or unknown                                           | no evidence of salt<br>wasting                                           |
| Definite | Untested or<br>unknown                               | (mass<br>spectrometry)<br>indicative of 21-<br>Hydroxylase<br>Deficiency CAH | Untested or<br>unknown   | Normal for<br>age           | Untested or unknown                                           | other hormonal<br>evidence of CAH                                        |
| Definite | Untested or<br>unknown                               | Untested or<br>unknown                                                       | >135                     | Untested<br>or<br>unknown   | two classic gene<br>mutations or deletions<br><i>in trans</i> | Ambiguous<br>genitalia in<br>46,XX                                       |
| Definite | Untested or<br>unknown                               | Untested or<br>unknown                                                       | >135                     | Untested<br>or<br>unknown   | two classic gene<br>mutations or deletions<br><i>in trans</i> | no evidence of salt<br>wasting                                           |
| Definite | Untested or<br>unknown                               | Untested or<br>unknown                                                       | >135                     | Untested<br>or<br>unknown   | two classic gene<br>mutations or deletions<br><i>in trans</i> | other hormonal<br>evidence of CAH                                        |
| Definite | Untested or<br>unknown                               | Untested or<br>unknown                                                       | Untested or<br>unknown   | Normal for<br>age           | two classic gene<br>mutations or deletions<br><i>in trans</i> | Ambiguous<br>genitalia in<br>46,XX                                       |

|          |                     |                     |                     |                     |                                                            |                                                           |
|----------|---------------------|---------------------|---------------------|---------------------|------------------------------------------------------------|-----------------------------------------------------------|
| Definite | Untested or unknown | Untested or unknown | Untested or unknown | Normal for age      | two classic gene mutations or deletions<br><i>in trans</i> | no evidence of salt wasting                               |
| Definite | Untested or unknown | Untested or unknown | Untested or unknown | Normal for age      | two classic gene mutations or deletions<br><i>in trans</i> | other hormonal evidence of CAH                            |
| Probable | 1,000 -10,000       | Untested or unknown | >135                | Untested or unknown | Untested or unknown                                        | Ambiguous genitalia in 46,XX or normal genitalia in 46,XY |
| Probable | 1,000 -10,000       | Untested or unknown | Untested or unknown | Normal for age      | Untested or unknown                                        | Ambiguous genitalia in 46,XX or normal genitalia in 46,XY |
| Probable | 1,000 -10,000       | Untested or unknown | Untested or unknown | Untested or unknown | Untested or unknown                                        | no evidence of salt wasting                               |
